# Supplementary material for: The Global Growth of ‘Sustainable Diet’ during Recent Decades, a Bibliometric Analysis
Source: MDPI journal article supplement (doi:10.3390/su151511957), 2023-08-03
Supplement: s1 [file s1]

**Supplementary Tables and Figure for the article:**

**‘The global growth of ‘sustainable diet’ during the last decades, a bibliometric analysis’**

**Gialeli et al.**

**Table S1.** Main Scientific Events and publications (Burlingame et al., 2022).

| <b>Year</b> | <b>Event</b>                                                | <b>Type</b>                        | <b>Reference</b>                                        |
|-------------|-------------------------------------------------------------|------------------------------------|---------------------------------------------------------|
| 1986        | First Introduction of the term of Sustainable Diets         | Scientific Publication             | (Gussow & Clancy 1986)                                  |
| 1993        | IUNS Nutrition ‘Nutrition in a Sustainable Environment’     | International Congress             | (Wahlqvist et al., 1994)                                |
| 2005        | New Nutrition Science Project                               | Scientific Project                 | (Cannon & Leitzmann, 2005)                              |
| 2005        | Giessen Declaration                                         | -                                  | (Beaumont et al., 2005)                                 |
| 2005        | Special Issue of Public Health Nutrition (pp. 120)          | Scientific Publication             | (Leitzmann et al., 2005)                                |
| 2006        | Special Issue of Food Composition and Analysis (pp. 300)    | Scientific Publication             | (Murphy et al., 2008)                                   |
| 2009        | ‘The Mediterranean Diet as a Sustainable Diet Model’        | International Conference           | (Reddy et al., 2009)<br>(FAO, 2012)<br>(Akinyele, 2010) |
| 2009        | ‘Setting the Table’                                         | Report                             |                                                         |
| 2010        | ‘Biodiversity and Sustainable Diets: United against Hunger’ | International Scientific Symposium |                                                         |
| 2010        | Call for Action from the Door of Return (AGROFOODS)         | -                                  |                                                         |
| 2014        | FAO/WHO Second International Conference on Nutrition (ICN2) | International Conference           | (FAO et al., 2015).                                     |
| 2015        | ‘2015 Dietary Guidelines for Americans’                     | Dietary Guidelines                 | (Willett et al., 2019)<br>(FAO & WHO, 2019)             |
| 2019        | EAT Lancet                                                  | Commission                         |                                                         |
| 2019        | Term ‘Sustainable and Healthy Diets’ by FAO and WHO         | International Expert Consultation  |                                                         |

**Table S2.** The top 25 publishing countries in the SDs topic during 1986–2022.

| Country      | Articles | TP  | TC    | SCP | MCP | TC/TP |
|--------------|----------|-----|-------|-----|-----|-------|
| USA          | 194      | 777 | 5,340 | 145 | 49  | 6.87  |
| UK           | 126      | 437 | 5,059 | 71  | 55  | 11.58 |
| ITALY        | 106      | 337 | 1,851 | 74  | 32  | 5.49  |
| AUSTRALIA    | 69       | 274 | 1,106 | 45  | 24  | 4.04  |
| NETHERLANDS  | 66       | 212 | 3,001 | 50  | 16  | 14.16 |
| SPAIN        | 61       | 236 | 1,144 | 38  | 23  | 4.85  |
| GERMANY      | 59       | 180 | 773   | 39  | 20  | 4.29  |
| FRANCE       | 54       | 251 | 1,347 | 37  | 17  | 5.37  |
| SWEDEN       | 33       | 126 | 805   | 14  | 19  | 6.39  |
| CHINA        | 33       | 108 | 446   | 18  | 15  | 4.13  |
| CANADA       | 31       | 113 | 422   | 24  | 7   | 3.73  |
| PORTUGAL     | 29       | 121 | 568   | 21  | 8   | 4.69  |
| INDIA        | 29       | 97  | 364   | 21  | 8   | 3.75  |
| BRAZIL       | 27       | 88  | 238   | 21  | 6   | 2.70  |
| BELGIUM      | 20       | 69  | 607   | 9   | 11  | 8.80  |
| FINLAND      | 20       | 66  | 284   | 16  | 4   | 4.30  |
| NEW ZEALAND  | 20       | 50  | 421   | 12  | 8   | 8.42  |
| SWITZERLAND  | 17       | 81  | 184   | 6   | 11  | 2.27  |
| NORWAY       | 17       | 70  | 295   | 7   | 10  | 4.21  |
| IRELAND      | 16       | 45  | 732   | 13  | 3   | 16.27 |
| SOUTH AFRICA | 15       | 65  | 228   | 8   | 7   | 3.51  |
| POLAND       | 15       | 39  | 154   | 13  | 2   | 3.95  |
| DENMARK      | 13       | 61  | 225   | 8   | 5   | 3.69  |
| JAPAN        | 11       | 44  | 109   | 7   | 4   | 2.48  |
| GREECE       | 8        | 43  | 96    | 6   | 2   | 2.23  |

TP = Total number of publications, TC = Total number of citations, TC/TP = Average citations per document, SCP = Single country publications, MCP = Multiple country publications.

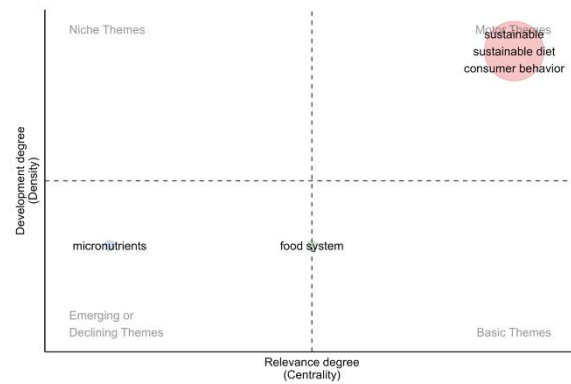

Time Slice 1986-2006

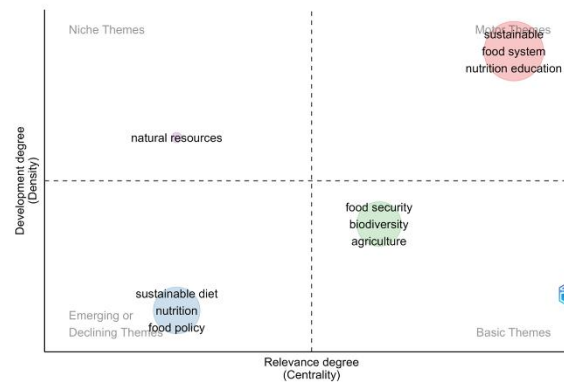

Time Slice 2007-2011

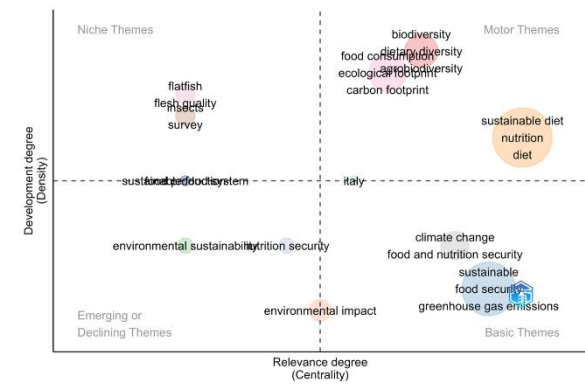

Time Slice 2012-2015

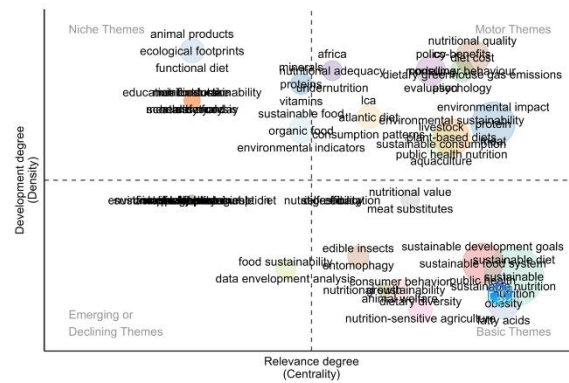

Time Slice 2016-2019

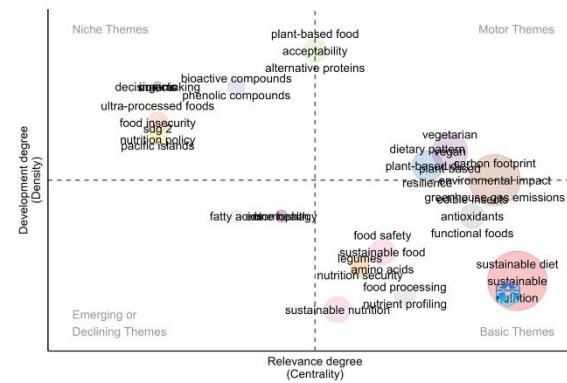

Time Slice 2020-2022

**Figure S1:** Thematic Evolution using authors' keywords in in five time slices: 1986–2006, 2007–2011, 2012–2015, 2016–2019, 2020–2022.
